# Supplementary material
Source: PubMed Central journal article supplement (PMC6288464)
Supplement: mmc1.pdf [file mmc1.pdf]

**The American Journal of Human Genetics, Volume 103**

**Supplemental Data**

**Inferring Transmission Histories of Rare Alleles  
in Population-Scale Genealogies**

**Dominic Nelson, Claudia Moreau, Marianne de Vriendt, Yixiao Zeng, Christoph Preuss, Hélène Vézina, Emmanuel Milot, Gregor Andelfinger, Damian Labuda, and Simon Gravel**

# Supplemental Material

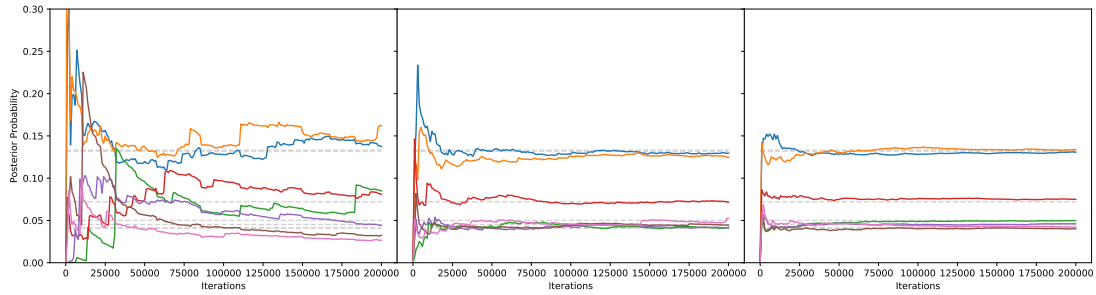

Figure S1: Convergence of likelihood estimates for 7 most-likely ancestors of a minor allele in a single simulated carrier panel. With importance sampling based left-to-right on: a possible path to coalescence only; the number of common ancestors shared with all other simulated carriers of the minor allele; likelihood of coalescing with other lineages.

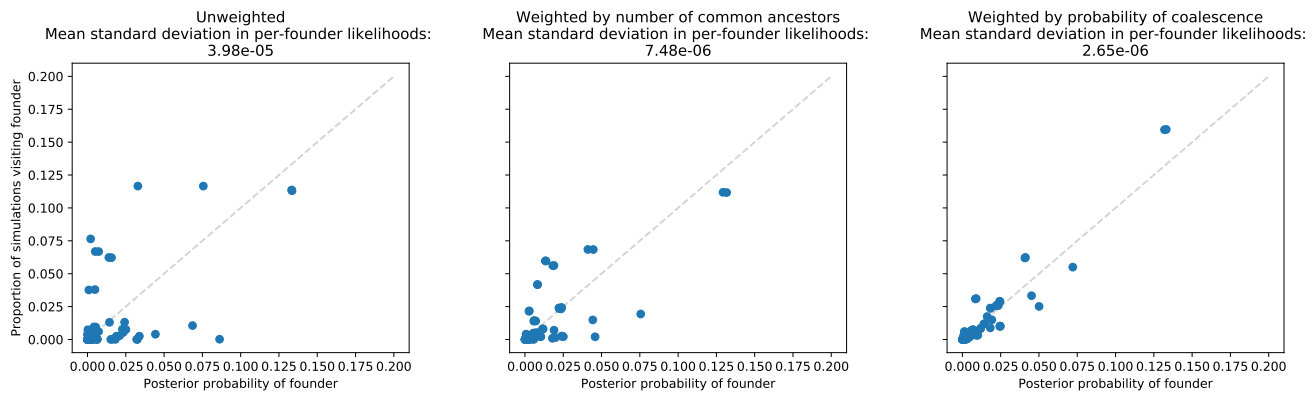

Figure S2: Proportion of simulated inheritance paths which lead to each founder versus converged founder posterior probability. With importance sampling based left-to-right on: a possible path to coalescence only; the number of common ancestors shared with all other simulated carriers of the minor allele; likelihood of coalescing with other lineages. Uses the same simulated carrier panel as Fig. S1. Importance sampling convergence is fastest when outcomes are sampled proportionally to their true probability.<sup>1</sup>

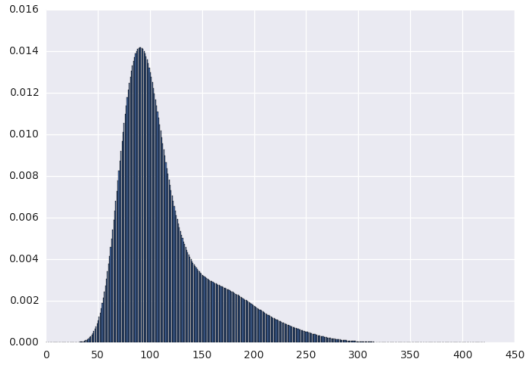

(A)

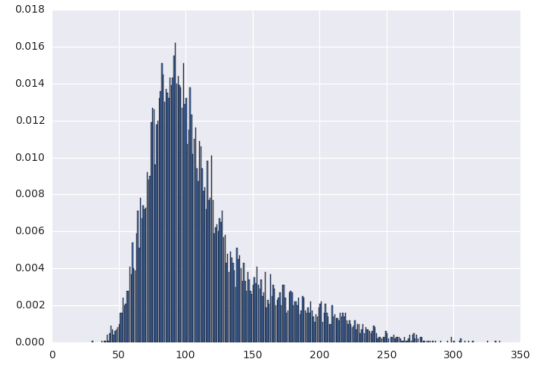

(B)

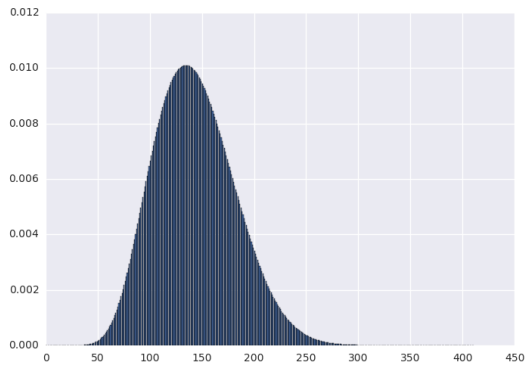

(C)

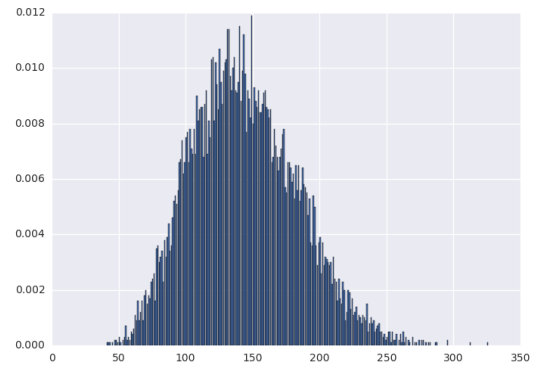

(D)

Figure S3: Comparison of simulated inheritance path allele frequency distributions (B, D) and their approximation via convolution of the distributions of the tree boundary (A, C) using the method described in Appendix C.

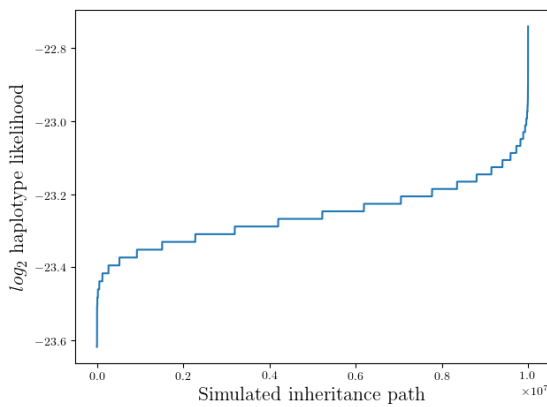

(A)

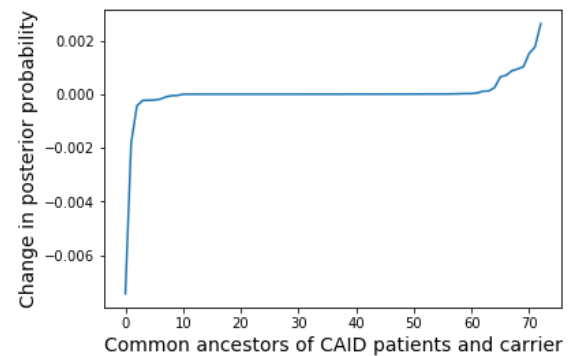

(B)

Figure S4: (A) Log-likelihoods of observing shared 2.9Mb segment in CAID patients and carrier, over all simulated inheritance paths. (B) Impact of incorporating shared haplotype length among CAID patients on estimated posterior probabilities of each common ancestor having been the true origin of the minor allele.

| Ind | Father | Mother | Sex |
|-----|--------|--------|-----|
| 1   | 11     | 12     | 1   |
| 2   | 15     | 14     | 2   |
| 3   | 15     | 14     | 2   |
| 11  | 102    | 101    | 1   |
| 12  | 0      | 0      | 2   |
| 13  | 102    | 101    | 1   |
| 14  | 0      | 0      | 2   |
| 15  | 103    | 104    | 1   |
| 16  | 103    | 104    | 2   |
| 18  | 105    | 106    | 2   |
| 19  | 105    | 106    | 2   |
| 20  | 107    | 108    | 2   |
| 21  | 107    | 108    | 1   |
| 101 | 0      | 0      | 2   |
| 102 | 202    | 201    | 1   |
| 103 | 0      | 0      | 1   |
| 104 | 202    | 201    | 2   |
| 105 | 202    | 201    | 1   |
| 106 | 0      | 0      | 2   |
| 107 | 202    | 201    | 1   |
| 108 | 0      | 0      | 2   |
| 201 | 0      | 0      | 2   |
| 202 | 0      | 0      | 1   |

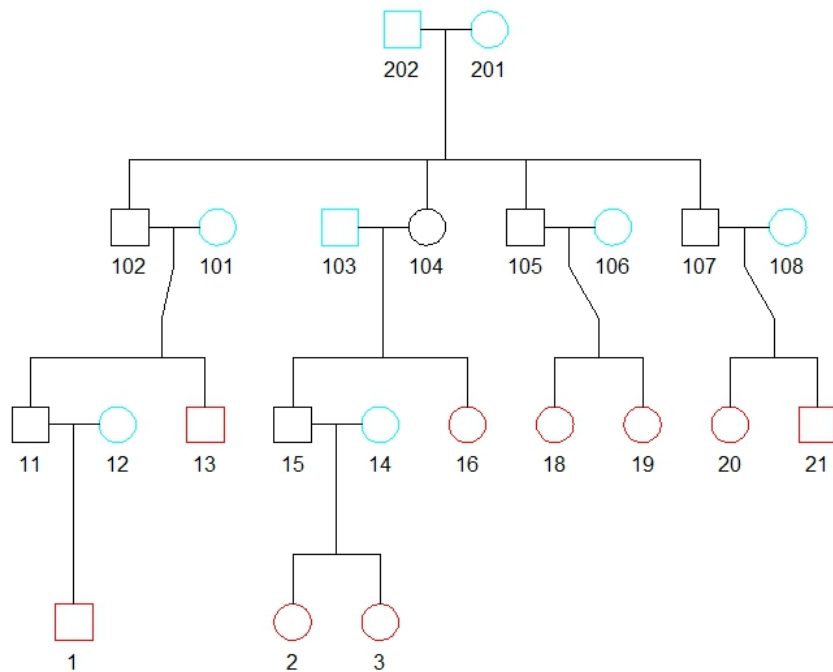

Table S1: Example pedigree and corresponding data format.

| Region                       | Years     | Baptisms | Marriages | Deaths  | Total     |
|------------------------------|-----------|----------|-----------|---------|-----------|
| Abitibi                      | 1898-1985 | 15       | 19 210    |         | 19 225    |
| Bas-Saint-Laurent            | 1701-1985 | 14       | 85 606    |         | 85 620    |
| Beauce                       | 1740-2013 | 17       | 58 515    | 3       | 58 535    |
| Bois-francs                  | 1671-2008 | 38       | 128 656   |         | 128 694   |
| Charlevoix                   | 1686-1995 | 91 380   | 29 614    | 48 410  | 169 404   |
| Côte-de-Beaupré              | 1661-1984 | 1        | 19 803    |         | 19 804    |
| Côte-du-Sud                  | 1679-1985 | 6        | 87 223    |         | 87 229    |
| Côte-Nord                    | 1677-2002 | 6        | 16 549    |         | 16 555    |
| Estrie                       | 1781-1989 | 14       | 128 648   |         | 128 662   |
| Gaspésie                     | 1693-1984 | 5        | 45 221    |         | 45 226    |
| Ile de Montréal              | 1643-2001 | 69       | 529 652   |         | 529 721   |
| Iles de la Madeleine         | 1772-1991 | 9 108    | 5 942     | 2 410   | 17 460    |
| Lanaudière                   | 1672-2007 | 8        | 93 409    |         | 93 417    |
| Laurentides                  | 1690-2003 | 4        | 61 060    |         | 61 064    |
| Mauricie                     | 1645-2002 | 115      | 111 673   |         | 111 788   |
| Outaouais                    | 1806-1993 | 66       | 111 872   |         | 111 938   |
| Québec (agglomération)       | 1621-2007 | 18       | 155 656   |         | 155 674   |
| Région de Québec             | 1675-2006 | 8        | 83 294    |         | 83 302    |
| Reste du Québec              | 1936-1985 |          | 1 708     |         | 1 708     |
| Richelieu                    | 1668-2006 | 9        | 148 571   |         | 148 580   |
| Rive nord ouest (Montréal)   | 1679-1992 | 3        | 63 297    |         | 63 300    |
| Rive sud (Montréal)          | 1670-1985 | 5        | 70 880    |         | 70 885    |
| Saguenay-Lac-St-Jean         | 1833-2007 | 431 464  | 92 721    | 122 959 | 647 144   |
| Témiscamisque                | 1881-1984 | 14       | 14 199    |         | 14 213    |
| Lieu indéterminé (au Québec) | 1657-2006 |          | 1 425     |         | 1 425     |
| ENSEMBLE DU QUÉBEC           |           | 431 495  | 2 164 404 | 173 782 | 2 870 573 |

Source : Fichier BALSAC, August 31 2017

\* All records prior to 1800 (N=69 000) come from the Programme de recherche en démographie historique (PRDH) of University of Montreal. They were obtained through exchanges and collaborative arrangements.

Figure S5: Number of vital event records per region of Quebec.<sup>2</sup> Table reproduced July 18th, 2018 from <http://balsac.uqac.ca/english/balsac-database/overview-of-data/>

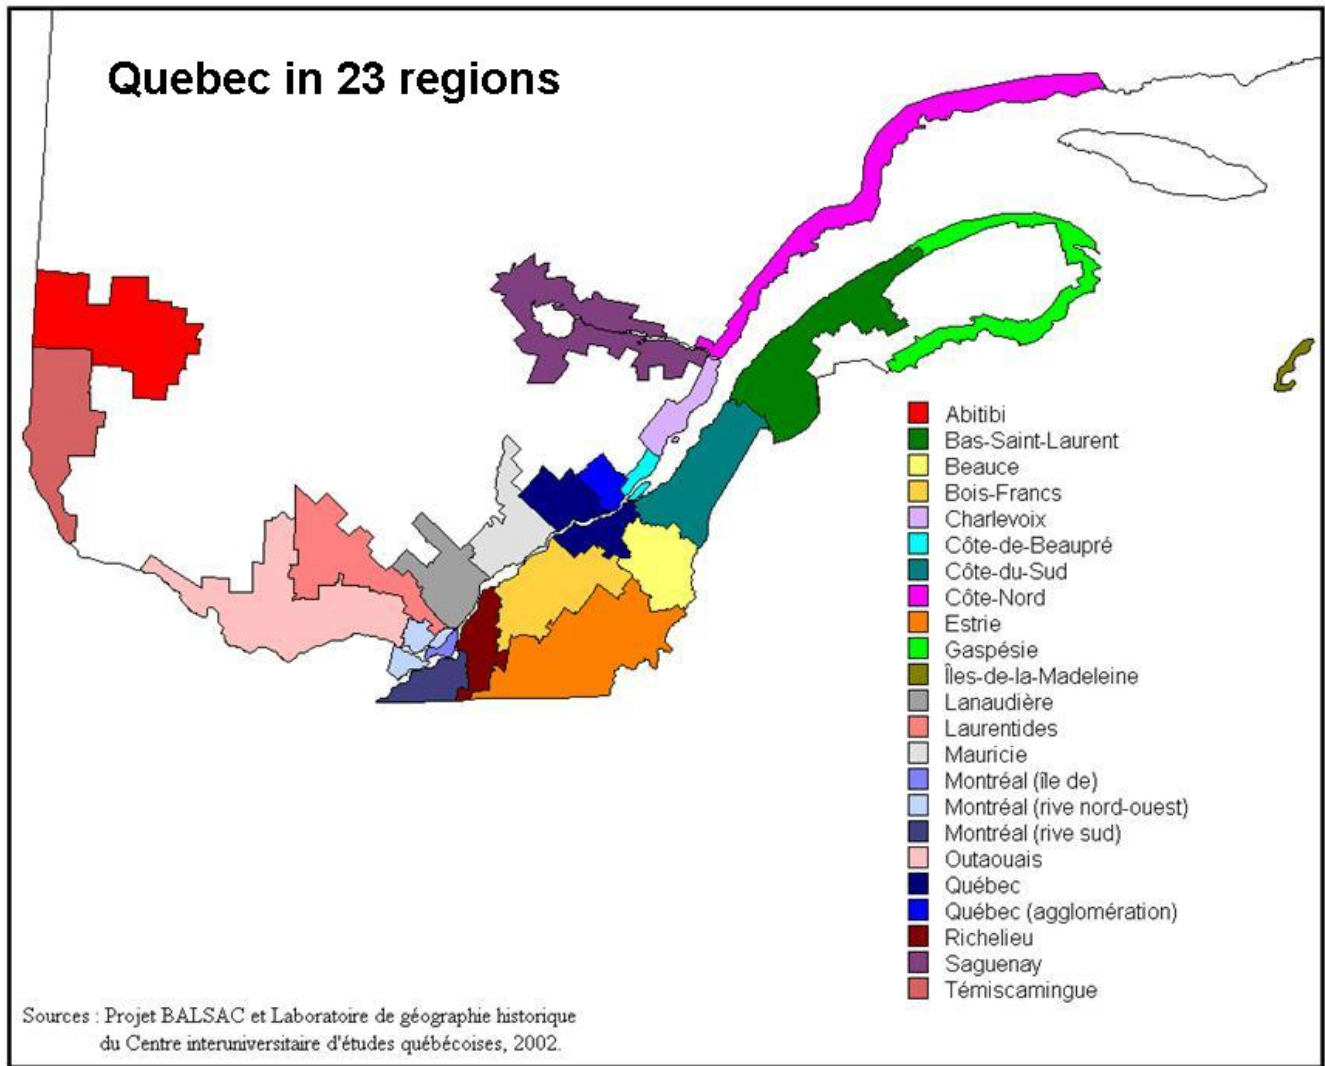

Figure S6: Quebec regions used in the BALSAC project.<sup>2</sup> Figure reproduced September 12th, 2018 from <http://balsac.uqac.ca/english/balsac-database/overview-of-data/>

| Region                 | Estimated Allele Frequency | 95% Confidence Interval |
|------------------------|----------------------------|-------------------------|
| ABITIBI                | 0.00128                    | (0.00127, 0.00129)      |
| BAS SAINT LAURENT      | 0.00163                    | (0.00156, 0.00169)      |
| BEAUCE                 | 0.00425                    | (0.00408, 0.00443)      |
| BOIS FRANCS            | 0.000882                   | (0.000858, 0.000908)    |
| CHARLEVOIX             | 0.00643                    | (0.00630, 0.00654)      |
| COTE DE BEAUPRE        | 0.00417                    | (0.00410, 0.00423)      |
| COTE DU SUD            | 0.00183                    | (0.00176, 0.00190)      |
| COTE NORD              | 0.00253                    | (0.00249, 0.00258)      |
| ESTRIE                 | 0.00144                    | (0.00141, 0.00146)      |
| GASPESIE               | 0.000738                   | (0.000696, 0.000767)    |
| ILE DE MONTREAL        | 0.000588                   | (0.000580, 0.000596)    |
| ILES DE LA MADELEINE   | 2.61e-05                   | (2.45e-05, 2.80e-05)    |
| LANAUDIERE             | 0.000462                   | (0.000450, 0.000473)    |
| LAURENTIDES            | 0.000500                   | (0.000486, 0.000515)    |
| MAURICIE               | 0.000808                   | (0.000789, 0.000825)    |
| OUTAOUAIS              | 0.000349                   | (0.000340, 0.000356)    |
| QUEBEC (AGGLOMERATION) | 0.00183                    | (0.00179, 0.00187)      |
| REGION DE QUEBEC       | 0.00118                    | (0.00113, 0.00124)      |
| RICHELIEU              | 0.000581                   | (0.000566, 0.000598)    |
| RIVE NORD OUEST (MTL)  | 0.000390                   | (0.000382, 0.000399)    |
| RIVE SUD (MTL)         | 0.000477                   | (0.000470, 0.000482)    |
| SAGUENAY (LAC ST JEAN) | 0.00520                    | (0.00512, 0.00527)      |
| TEMISCAMINGUE          | 0.000794                   | (0.000786, 0.000802)    |
| All Probands           | 0.00167                    |                         |

Table S2: Estimated regional frequencies of the CAID allele within the province of Quebec, among individuals linked to the BALSAC genealogical database. Confidence intervals estimated from bootstrapping over simulated inheritance paths.

| Error Measure                  | Kinship-Based | ISgen    | ISgen / Kinship |
|--------------------------------|---------------|----------|-----------------|
| MAE                            | 0.00105       | 0.000784 | 0.74            |
| RMSE                           | 0.00204       | 0.00169  | 0.83            |
| MAE (estimated freq < 0.005)   | 0.000885      | 0.000591 | 0.67            |
| RMSE, (estimated freq < 0.005) | 0.00146       | 0.000983 | 0.67            |

Table S3: Mean absolute error and root mean squared error in regional allele frequency estimates for ISgen (path-based) and a kinship-based method. We simulated 100 patient panels and corresponding regional allele frequencies. Simulated regional allele frequencies were compared to inference results based on patient panels and estimated global allele frequency.

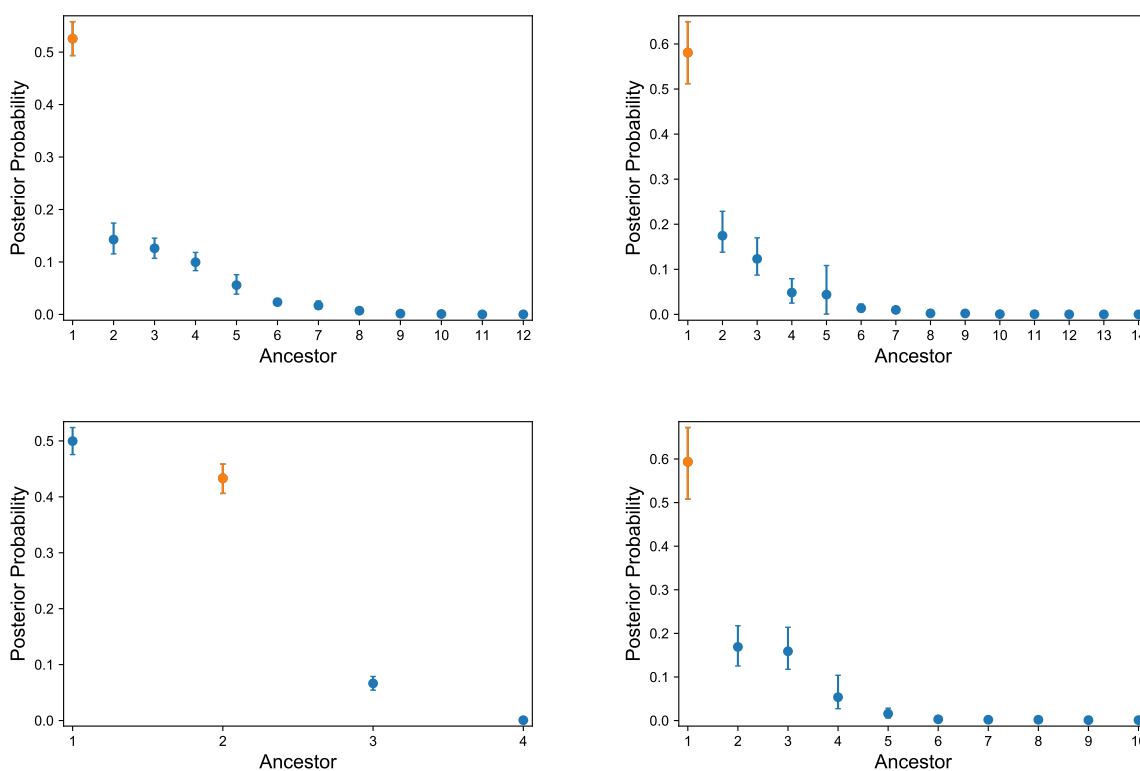

Figure S7: Ancestor posterior probabilities for 4 simulated patient panels, similar to the one displayed in Figure 4. The ancestor generating the panel is shown in orange. Error bars represent uncertainty due to the finite sample size (i.e., the finite number of iterations) in importance sampling. 95% confidence intervals were obtained from bootstrapping over iterations. Only ancestors with nonzero posterior probability are displayed, and ancestor labels represent ordering by posterior probability for a given simulation.



## References

- [1] Srinivasan, R. (2002). *Importance Sampling: Applications in Communications and Detection*. (Springer-Verlag).
- [2] BALSAC. (2018). BALSAC Population Database: 2016-2017 Annual Report. [http://balsac.uqac.ca/english/files/2018/01/BALSAC\\_RA2017\\_EN\\_page\\_WEB\\_v2-1.pdf](http://balsac.uqac.ca/english/files/2018/01/BALSAC_RA2017_EN_page_WEB_v2-1.pdf).
